# Supplementary material for: Overexpression of NtSOS2 From Halophyte Plant N. tangutorum Enhances Tolerance to Salt Stress in Arabidopsis
Source: Front Plant Sci. 2021 Sep 6;12:716855. doi: 10.3389/fpls.2021.716855 (PMC8450600; doi:10.3389/fpls.2021.716855)
Supplement: Supplementary Table 1 — Primers for Quantitative RT-PCR. [file Data_Sheet_2.xlsx]

## Sheet: Supplementary Table 1
Supplementary Table 1. Primers for Quantitative RT-PCR
Primer	Sequence(5'-3')
q-NtSOS2-F	ATGAAGAAGAAGACGAAGAGG
q-NtSOS2-R	CAACCATTCTGTGCTTAAGAA
q-NtActin-F	GGAATCCACGAGACCACCTACA
q-NtActin-R	GATTGATCCTCCGATCCAGACA
q-AtSOS1-F	CGCACTTGGAGCTGTAGGCA
q-AtSOS1-R	CCCAGCCCACTCTTGAGCAG
q-AtCAX1-F	AACGCAACGTGTGGAAACGC
q-AtCAX1-R	TCGAACCGCTGTTCCCTTCG
q-AtNHX1-F	ACAATGTGCCTCGGCCTGAC
q-AtHKT1-F	TCTTCTTGGAGTGACGGTGC
q-AtHKT1-R	ATAGTTTCTCCGGTGTGTCGC
q-TUB6-F	GAAACCTTGAAGACAGTCGCAAT
q-TUB6-R	GCAATCTGGTGCTGGAAACAA

## Sheet: Supplementary Table 2
Supplementary Table 2. Primers for Subcellular localization
Primer	Sequence(5'-3')
NtSOS2-F-166	CATGGCGTGCAGGTCGACTCTAGAATGAAGAAGAAGACGAAGAGGGTTGG
NtSOS2-R-166	CTCCTCGCCCTTGCTCACCATGGATCCGCAGGTCATTGTTCTGATCAGACTGG

## Sheet: Supplementary Table 3
Supplementary Table 3. Primers for constructing overexpression gene vector
Primer	Sequence(5'-3')
NtSOS2-F-121	TTTGGAGAGAACACGGGGGACTCTAGAATGAAGAAGAAGACGAAGAGGGTTG
NtSOS2-R-121	CATAAGGGACTGACCACCCGGGGATCCGCAGGTCATTGTTCTGATCAGACTG

## Sheet: Supplementary Table 4
Supplementary Table 4. SOS2 gene and its sequence number in different species used in DNAMAN
Species	Gene name	Gene ID
Arabidopsis thaliana	AtSOS2	NM122932.5
Solanum lycopersicum	SlSOS2	NM001247281.2
Sorghum bicolor	SbSOS2	KY202762.1
Populus alba	PaSOS2	KT875331.1
Arachis hypogaea	AhSOS2	HG797656.1
Gossypium hirsutum	GhSOS2	GU188961.1
Oryza sativa	OsSOS2	LOC_Os06g40370

## Sheet: Supplementary Table 5
Supplementary Table 5. The CIPK genes used to construct phylogenetic tree in arabidopsis and rice
Arabidopsis			Rice
Gene name	Gene ID		Gene name	Gene ID
AtCIPK1	At3g17510		OsCIPK1	LOC_Os01g18800
AtCIPK2	At5g07070		OsCIPK2	LOC_Os07g48100
AtCIPK3	At2g26980		OsCIPK3	LOC_Os03g20380
AtCIPK4	At4g14580		OsCIPK4	LOC_Os12g41090
AtCIPK5	At5g10930		OsCIPK5	LOC_Os01g10890
AtCIPK6	At4g30960		OsCIPK6	LOC_Os08g34240
AtCIPK7	At3g23000		OsCIPK7	LOC_Os03g43440
AtCIPK8	At4g24400		OsCIPK8	LOC_Os01g35184
AtCIPK9	At1g01140		OsCIPK9	LOC_Os03g03510
AtCIPK10	At5g58380		OsCIPK10	LOC_Os03g22050
AtCIPK11	At2g30360		OsCIPK11	LOC_Os01g60910
AtCIPK12	At4g18700		OsCIPK12	LOC_Os01g55450
AtCIPK13	At2g34180		OsCIPK13	LOC_Os01g10870
AtCIPK14	At5g01820		OsCIPK14	LOC_Os12g02200
AtCIPK15	At5g01810		OsCIPK15	LOC_Os11g02240
AtCIPK16	At2g25090		OsCIPK16	LOC_Os09g25090
AtCIPK17	At1g48260		OsCIPK17	LOC_Os05g04550
AtCIPK18	At1g29230		OsCIPK18	LOC_Os05g26820
AtCIPK19	At5g45810		OsCIPK19	LOC_Os05g43840
AtCIPK20	At5g45820		OsCIPK20	LOC_Os05g11790
AtCIPK21	At5g57630		OsCIPK21	LOC_Os07g44290
AtCIPK22	At2g38490		OsCIPK22	LOC_Os05g26940
AtCIPK23	At1g30270		OsCIPK23	LOC_Os07g05620
AtCIPK24	At5g35410		OsCIPK24	LOC_Os06g40370
AtCIPK25	At5g25110		OsCIPK25	LOC_Os06g35160
AtCIPK26	At5g21326		OsCIPK26	LOC_Os02g06570
			OsCIPK27	LOC_Os09g25100
			OsCIPK28	LOC_Os05g39870
			OsCIPK29	LOC_Os07g48090
			OsCIPK30	LOC_Os01g55440
			OsCIPK31	LOC_Os07g48760
			OsCIPK32	LOC_Os12g03810
			OsCIPK33	LOC_Os11g03970
			OsCIPK34	LOC_Os02g08140

## Sheet: Supplementary Table6
Supplementary Table 6. Primers for isolation of NtSOS2 fragment
Primer	Sequence(5'-3')
NtSOS2-F	TGAGGAACCATGAAGAAGAAGACGAAGAG
NtSOS2-R	ATAACGCAGGAGGATCAGCAGGTCATTGT
